# Supplementary material for: The role of miR-24 as a race related genetic factor in prostate cancer
Source: PubMed Central journal article supplement (PMC5369986; doi:10.18632/oncotarget.15016), 2017-02-02
Supplement: oncotarget-08-16581-s001.pdf [file oncotarget-08-16581-s001.pdf]

## The role of miR-24 as a race related genetic factor in prostate cancer

### Supplementary Materials

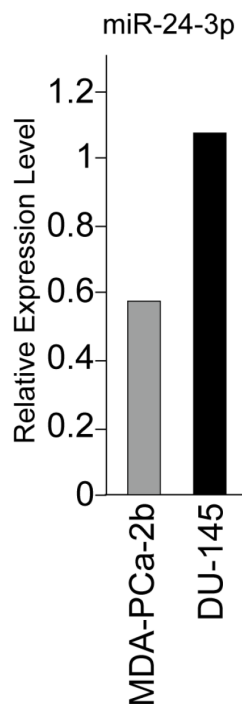

**Supplementary Figure 1: miR-24 expression in MDA-PCa-2b and DU-145 cells.** Bars indicate miR-24 relative expression level.

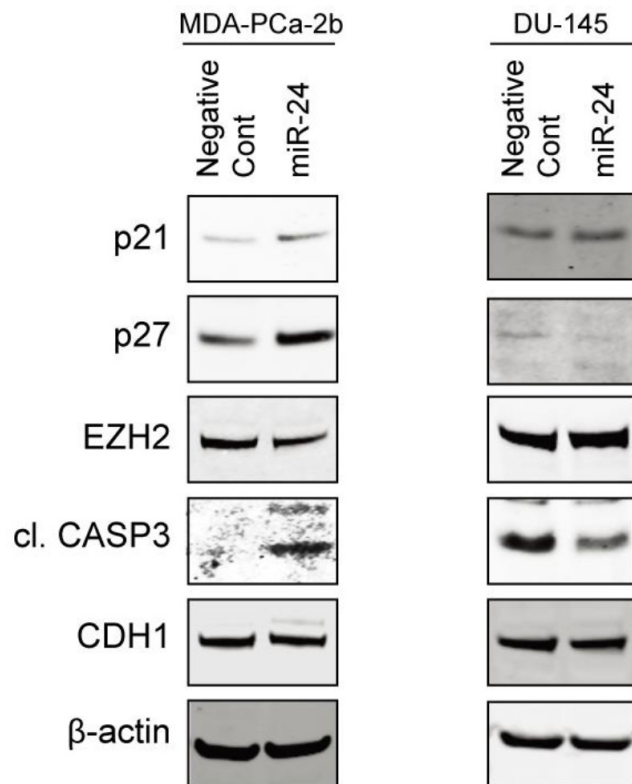

**Supplementary Figure 2: Protein expression levels of cell proliferation and cancer related genes.** Results of Western blotting after miR-24 mimic or negative control transfection.



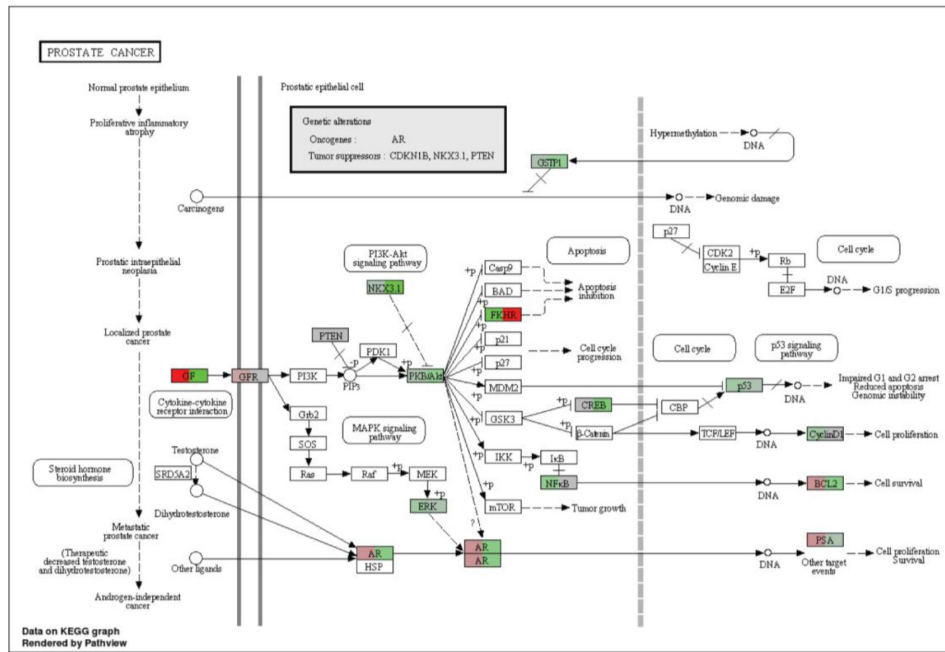

**Supplementary Figure 4: Cancer-related gene pathway showing gene expression changes by miR-24-3p.** Pathway map with representative genes altered by miR-24. “Pathview” analysis mapped qPCR array data to full map of “Pathway in Cancer” that has been defined by KEGG pathway database and renders pathway graph with the mapped data. The boxes surrounding gene symbols are illustrated by two colors. Left side color of the box shows expression change in DU-145 cells after miR-24 transfection and right side shows that for MDA-PCa-2b cells. The color indicates gene expression level in each cell line.

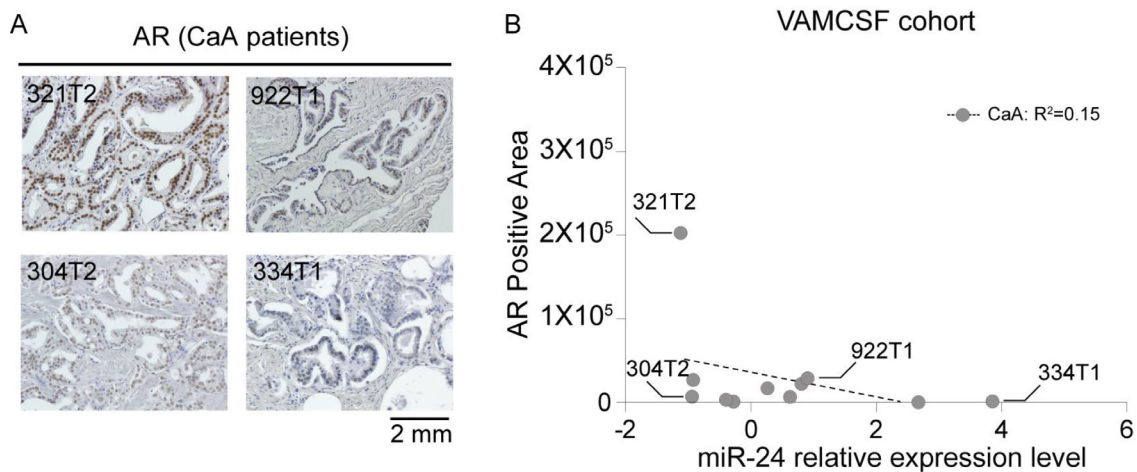

**Supplementary Figure 5: Analyses of AR protein expression in CaA PCa tissues.** (A) Immunohistochemical staining of AR protein expression. The staining is representative of 11 CaA (Grey-filled circles) PCa tissues. The number shown in the IHC image indicates the sample ID that is the same as shown in Figure 6B. (B) Association of AR expression positive area and miR-24 expression level in 11 CaA tissues.

**Supplementary Table 1: Primer list of gene expression analysis**

| Gene name      |         | Sequence                | Tm |
|----------------|---------|-------------------------|----|
| <i>Bcl2</i>    | Forward | GTGGATGACTGAGTACCTGAAC  | 58 |
|                | Reverse | GCCAGGAGAAATCAAACAGAGG  |    |
| <i>ETV1</i>    | Forward | CTGAACCCTGTAACCTTTCC    | 58 |
|                | Reverse | AGACATCTGGCGTTGGTACATA  |    |
| <i>IGF1</i>    | Forward | AGCAGTCTTCCAACCAATTA    | 58 |
|                | Reverse | CAGAGCTGGTGAAGGTGAG     |    |
| <i>IGFBP5</i>  | Forward | ACCTGAGATGAGACAGGAGTC   | 58 |
|                | Reverse | GTAGAATCCTTTGCGGTCACAA  |    |
| <i>STK11</i>   | Forward | TGTCGGTGGGTATGGACAC     | 58 |
|                | Reverse | CCTTGCCGTAAGAGCCTTCC    |    |
| <i>VEGFA</i>   | Forward | AGGGCAGAATCATCACGAAGT   | 58 |
|                | Reverse | AGGGTCTCGATTGGATGGCA    |    |
| <i>AR</i>      | Forward | GACGACCAGATGGCTGTCATT   | 58 |
|                | Reverse | GGGCGAAGTAGAGCATCCT     |    |
| <i>PDPK1</i>   | Forward | TTCCGAGCTGGAAACGAGTAT   | 58 |
|                | Reverse | GGTCTCTTGCCCTTAGGGAAGAA |    |
| <i>B2M</i>     | Forward | CGTGTGAACCATGTGACTTTG   | 58 |
|                | Reverse | GGCATCTTCAAACCTCCATG    |    |
| <i>PPP2R1B</i> | Forward | CTTGTGTCAGTATTGCCAGT    | 58 |
|                | Reverse | TGCTGCTTGTGCAAGTGTAGG   |    |

  

| Gene name |         | Sequence                                        |
|-----------|---------|-------------------------------------------------|
| AR-1      | Forward | AGCTTTGTTTAAACTGCGTCCCAGAGCCTGGAGCCGTCTAGACTAG  |
|           | Reverse | CTAGTCTAGACGGCTCCAGGCTCTGGGACGCAGTTTAAACAAAGCT  |
| AR-2      | Forward | AGCTTTGTTTAAACTTGTGCTGCCTCTTAGTCATCTAGACTAG     |
|           | Reverse | CTAGTCTAGATGACTAAGAGGCAGCAACAAGTTTAAACAAAGCT    |
| IGFBP5-1  | Forward | AGCTTTGTTTAAACTCCCCTGAGAAAAGACTGAGCCATCTAGACTAG |
|           | Reverse | CTAGTCTAGATGGCTCAGTCTTTTCTCAGGGGAGTTTAAACAAAGCT |
| IGFBP5-2  | Forward | AGCTTTGTTTAAACAAATGGGAGTTCTGGCTGAGCCCTCTAGACTAG |
|           | Reverse | CTAGTCTAGAGGGCTCAGCCAGAACTCCCATTTGTTTAAACAAAGCT |
| IGF1      | Forward | AGCTTTGTTTAAACCTGGGATTACAGGCATGAGCCACTCTAGACTAG |
|           | Reverse | CTAGTCTAGAGTGGCTCATGCCTGTAATCCCAGGTTTAAACAAAGCT |
| VEGFA-1   | Forward | AGCTTTGTTTAAACAACCCAGCCCTGGCGCTGAGCCTTCTAGACTAG |
|           | Reverse | CTAGTCTAGAAGGCTCAGCGCCAGGGCTGGGTTGTTTAAACAAAGCT |
| VEGFA-2   | Forward | AGCTTTGTTTAAACGACAAGGACGACTTGACTCGGTTCTAGACTAG  |
|           | Reverse | CTAGTCTAGAACCGAGTCAAGTCGTCCTTGTCGTTTAAACAAAGCT  |

**Supplementary Table 2: 2 × 2 contingency table that describes the correlation between miR-24 expression level and race-related PCa**

| Data analyzed   | CaA | AfA | Total |
|-----------------|-----|-----|-------|
| High Expression | 5   | 1   | 6     |
| Low Expression  | 46  | 80  | 126   |
| <b>Total</b>    | 51  | 81  | 132   |

Cut off;  $Z = 2$ , Fisher's exact test,

$p = 0.0318$ ,

OR = 8.562693, 95% CI [0.9850 76.77].

**Supplementary Table 3: Pathway analysis of the genes decreased after miR-24 transfection by CPDB**

| Pathway Name                                                                                                                | Set Size | Candidates Contained | $p$ -value | $q$ -value | Pathway Source |
|-----------------------------------------------------------------------------------------------------------------------------|----------|----------------------|------------|------------|----------------|
| Prostate cancer - Homo sapiens (human)                                                                                      | 89       | 8 (9.0%)             | 5.87E-11   | 1.58E-08   | KEGG           |
| Pathways in cancer - Homo sapiens (human)                                                                                   | 398      | 12 (3.0%)            | 1.67E-10   | 2.25E-08   | KEGG           |
| Integrated Pancreatic Cancer Pathway                                                                                        | 170      | 9 (5.3%)             | 3.78E-10   | 3.39E-08   | Wikipathways   |
| Coregulation of Androgen receptor activity                                                                                  | 61       | 5 (8.2%)             | 5.21E-07   | 3.51E-05   | PID            |
| AMPK signaling pathway - Homo sapiens (human)                                                                               | 124      | 6 (4.9%)             | 7.44E-07   | 4.00E-05   | KEGG           |
| FOXA1 transcription factor network                                                                                          | 44       | 4 (9.1%)             | 5.28E-06   | 2.37E-04   | PID            |
| Regulation of Insulin-like Growth Factor (IGF) transport and uptake by Insulin-like Growth Factor Binding Proteins (IGFBPs) | 21       | 3 (14.3%)            | 2.24E-05   | 8.00E-04   | Reactome       |
| Integrated Breast Cancer Pathway                                                                                            | 64       | 4 (6.2%)             | 2.38E-05   | 8.00E-04   | Wikipathways   |
| PI3K-Akt signaling pathway - Homo sapiens (human)                                                                           | 347      | 7 (2.0%)             | 2.79E-05   | 8.15E-04   | KEGG           |
| AMPK Signaling                                                                                                              | 68       | 4 (5.9%)             | 3.03E-05   | 8.15E-04   | Wikipathways   |
| SIDS Susceptibility Pathways                                                                                                | 159      | 5 (3.1%)             | 5.80E-05   | 1.36E-03   | Wikipathways   |
| Gastric Cancer Network 1                                                                                                    | 29       | 3 (10.3%)            | 6.05E-05   | 1.36E-03   | Wikipathways   |
| Apoptosis                                                                                                                   | 84       | 4 (4.8%)             | 6.96E-05   | 1.44E-03   | Wikipathways   |
| Androgen receptor signaling pathway                                                                                         | 89       | 4 (4.5%)             | 8.73E-05   | 1.68E-03   | Wikipathways   |
| Transcriptional misregulation in cancer - Homo sapiens (human)                                                              | 179      | 5 (2.8%)             | 1.02E-04   | 1.74E-03   | KEGG           |
| CREB phosphorylation through the activation of CaMKK                                                                        | 6        | 2 (33.3%)            | 1.03E-04   | 1.74E-03   | Reactome       |
| MicroRNAs in cancer - Homo sapiens (human)                                                                                  | 297      | 6 (2.0%)             | 1.15E-04   | 1.75E-03   | KEGG           |
| IGF signaling                                                                                                               | 36       | 3 (8.3%)             | 1.17E-04   | 1.75E-03   | INOH           |
| Focal Adhesion                                                                                                              | 190      | 5 (2.6%)             | 1.35E-04   | 1.91E-03   | Wikipathways   |
| HIF-1 signaling pathway - Homo sapiens (human)                                                                              | 103      | 4 (3.9%)             | 1.54E-04   | 2.07E-03   | KEGG           |
